# Supplementary material for: Reduced expression of somatostatin in GABAergic interneurons derived from induced pluripotent stem cells of patients with parkin mutations
Source: PubMed Central journal article supplement (PMC6339354; doi:10.1186/s13041-019-0426-7), 2019-01-18
Supplement: 13041_2019_426_MOESM1_ESM.pdf [file 13041_2019_426_MOESM1_ESM.pdf]

**Table S1. Real-time PCR primer**

| <b>Symbol</b>  | <b>Forward primer (5'→3')</b> | <b>Reverse primer (5'→3')</b> |
|----------------|-------------------------------|-------------------------------|
| ASCL1          | GATGAGTAAGGTGGAGACACTGCG      | CCGACGAGTAGGATGAGACCG         |
| CB             | TGGATCAGTATGGGCAAAGAGA        | ATCGGAAGAGCAGCAGGAAAT         |
| CCK            | AGGGTATCGCAGAGAACGGA          | CTTATCCTGTGGCTGGGGTC          |
| CR             | TGGAAGCACTTTGACGCAGAC         | CAGAGCCTTTCCTTGCCTTCT         |
| DLX2           | ACGCTCCCTATGGAACCAGTT         | TCCGAATTTTCAGGCTCAAGGT        |
| DLX6           | CCGAACTGGCAGCTTCCTTAG         | GGGTCGCTCTCATGAGGATTAC        |
| EMX2           | GCTTCTAAGGCTGGAACACG          | CCAGCTTCTGCCTTTTGAAC          |
| GAD1/67        | GCCAGACAAGCAGTATGATGT         | CCAGTTCAGGCATTTGTTGAT         |
| GSX2           | GAGATTCCACTGCCTCACCATG        | CTCCGGAGTCGAGACAGGTAC         |
| HTR3A          | GGGTGCTGCCCTACTTTTCG          | GAAGATGCTGGGCAGTAGCAG         |
| LHX6           | GCAGAACAGCTGCTACATCAAGAA      | CAGTCGCTGGCGTAGATCTGTC        |
| Nestin         | TTCCCTCAGCTTTCAGGACCCCAA      | CAGTCGCTGGCGTAGATCTGTC        |
| NGN2           | TGGGTCTGGTACACGATTGC          | GTCTTCTTGATGCGCTGCAC          |
| NKX2.1         | GCCGTACCAGGACACCATGA          | GCTCATGTTTCATGCCGCTCG         |
| NKX6.2         | TCCTGGACAAGGACGGGAAG          | ACTTGGTCTGCTCGAAGGTTT         |
| NOS1           | CCTATGGGGGAAGGGCAATG          | TTGACCTTGAGGAAGCGTGG          |
| NPY            | TGTTCCAGAACTCGGCTTG           | TGCATTGGTAGGATGGGTGG          |
| OCT3/4         | AAGCGAACCAGTATCGAGAACC        | CTGATCTGCTGCAGTGTGGGT         |
| PV             | TGACAGACTTGCTGAACGCT          | TCAGGCCGACCATTTGGAAG          |
| SST            | CCCCAGACTCCGTTCAGTTTCT        | CATTCTCCGTCTGGTTGGGT          |
| RELN           | GCTTGCTGGTGACAGGACTA          | GAGAGGCTACCACACTGCAC          |
| VIP            | TCTCACAGACTTCGGCATGG          | TCATTTGCTCCCTCAAAGGGT         |
| $\beta$ -actin | GATCAAGATCATTGCTCCTCCT        | GGGTGTAACGCAACTAAGTCA         |
